# Supplementary material
Source: ML conference proceedings conference paper supplement (https://openreview.net/forum?id=Fn17vlng9pD)
Supplement: supplementary_material [file attachment]

---

# NIERT: Accurate Numerical Interpolation through Unifying Scattered Data Representations using Transformer Encoder

---

Anonymous Author(s)

Affiliation

Address

email

## 1 A Broader impact

2 Numerical interpolation is fundamental in numerical methods and and its has been widely used  
3 in a large variety of practical scenarios. In this study, our NIERT approach has been verified in  
4 temperature-field reconstruction and time-series data imputation, which shows its potential in weather  
5 prediction, industrial environmental monitoring.

## 6 B Theoretical explanation of NIERT

7 Here we provide a theoretical explanation of NIERT to explain why NIERT performs excellent in  
8 tasks of scattered data interpolation. This explanation is based on the tight connection between the  
9 core mechanism of NIERT, namely partial self-attention mechanism, and classical RBF interpolation  
10 algorithm.

Given  $n$  observed points, RBF interpolation formulates the interpolant as

$$\hat{f}(x) = \sum_{j=1}^n \lambda_j \phi(x, x_j)$$

where  $\phi(x, x_j)$  is the radial basis function related to the observed point  $x_j$  and  $\lambda_j$  is the coefficient to be determined. In partial self-attention layer of NIERT, a point  $x_i$ 's representation  $\tilde{v}_i$  is computed by

$$\tilde{v}_i = \sum_{j=1}^n \alpha(q_i, k_j) v_j$$

11 where  $\alpha(q_i, k_j)$  is the normalized attention weight function.  $\alpha(q_i, k_j)$  models the correlation between  
12 any query vector  $q_i$  ( $q_i$  is related to an observed point or a target point) and key vector  $k_j$  ( $k_j$  is  
13 related to an observed point  $x_j$ ).

14 Obviously, we can regard partial self-attention as a general form of RBF interpolant by corresponding  
15  $\alpha(\cdot, \cdot)$  to  $\phi(\cdot, \cdot)$  and  $v_j$  to  $\lambda_j$ . Based on neural networks,  $\alpha(\cdot, \cdot)$  and  $v_j$  is learnable. Thus by adding  
16 other appropriate modules and mechanisms, such as MLPs, skip connection, layer normalization,  
17 multi-head mechanisms, and applying supervised training, it is promising to get a high-accuracy  
18 neural interpolator, which adapts to a certain function distribution.

## 19 C Implementation and experiment details

20 We provide the details of implementation and experiments in this section and deposit source code of  
21 NIERT at <https://anonymous.4open.science/r/NIERT-2BCF>.

22 **On NeSymReS dataset:**

23 Table 4 lists the the hyper-parameters of NIERT when running on the NeSymReS dataset. For fair  
 24 comparison, we set up the TFR-transformer with the same  $H$  and  $d_{model}$ , and the number of its  
 25 encoder layers is set to 5 and that of its decoder is set to 1 following [1], which shows its best  
 performance. We trained NIERT and the neural approaches for comparison on two NVIDIA GeForce

| Parameter name             | Symbol      | Value           |
|----------------------------|-------------|-----------------|
| Number of layers           | $L$         | 6               |
| Hidden dimension           | $d_{model}$ | 512             |
| Number of heads            | $H$         | 8               |
| $x$ 's embedding dimension | $d_{xemb}$  | $16 \times d_x$ |
| $y$ 's embedding dimension | $d_{yemb}$  | 16              |

Table 4: Hyper-parameters of NIERT in experiments on NeSymReS dataset

26  
 27 RTX 3090 GPUs for 160 epochs with a batch size of 128. Adam optimizer with a learning rate of  
 28  $1.0 \times 10^{-4}$  and no schedules are performed for parameters optimization.

29 **On TFRD-ADlet and PhysioNet dataset:**

30 For experiments on TFRD-ADlet and PhysioNet dataset, we use the NIERT implementation whose  
 31 hyper-parameters are listed in Table 5. The pre-trained NIERT also has the same hyper-parameters.  
 32 Also, for fair comparison, we set up the TFR-transformer with the same  $H$  and  $d_{model}$ , and the  
 33 number of its encoder layers is set to 2 and that of its decoder is set to 1.

| Parameter name             | Symbol      | Value | Parameter name             | Symbol      | Value |
|----------------------------|-------------|-------|----------------------------|-------------|-------|
| Number of layers           | $L$         | 3     | Number of layers           | $L$         | 3     |
| Hidden dimension           | $d_{model}$ | 128   | Hidden dimension           | $d_{model}$ | 128   |
| Number of heads            | $H$         | 4     | Number of heads            | $H$         | 4     |
| $x$ 's embedding dimension | $d_{xemb}$  | 32    | $x$ 's embedding dimension | $d_{xemb}$  | 16    |
| $y$ 's embedding dimension | $d_{yemb}$  | 16    | $y$ 's embedding dimension | $d_{yemb}$  | 592   |

Table 5: Hyper-parameters of NIERT in experi-  
 ments on TFRD-ADlet dataset

Table 6: Hyper-parameters of NIERT in experi-  
 ments on PhysioNet dataset

35 For experiments on TFRD-ADlet dataset, we trained NIERT and the approaches for comparison on  
 36 one NVIDIA GeForce RTX 3090 GPU for 100 epochs with a batch size of 5. Adam optimizer with a  
 37 learning rate of  $5.0 \times 10^{-4}$  with a decay rate of 0.97 is performed. For experiments on PhysioNet  
 38 dataset, we trained NIERT on one NVIDIA GeForce RTX 3090 GPU for 160 epochs with a batch size  
 39 of 32. Adam optimizer with a learning rate of  $5.0 \times 10^{-4}$  and with a decay rate of 0.97 is performed.

40 Pre-trained NIERT on 2D NeSymReS is used to fine-tune on TFRD-ADlet dataset. To deal with the  
 41 problem that the data distribution is too different between NeSymReS data and temperature field in  
 42 TFRD-ADlet, we simply normalize the data of temperature field to the value range of 2D NeSymReS  
 43 data before fine-tuning.

44 To apply NIERT on PhysioNet dataset in which each instance has so many dependent variables with a  
 45 number of 37, we increase the number of MLPs for dependent variables to 37 in the embedding layer  
 46 to embed them separately. The pre-training instances for these tasks are correspondingly different. For  
 47 convenience, we stack 37 random 1D functions in NeSymReS dataset as an instance for pre-training.  
 48 Although the data generated using such construction method is considerable different from PhysioNet  
 49 data, we still observe that pre-training technique improves the interpolation accuracy as shown in  
 50 Table 3.

51 **D Dataset details**

52 We evaluated NIERT approach using three datasets, including two synthetic datasets NeSymReS and  
 53 TFRD-ADlet, and a real-world dataset PhysioNet, which are described in detail as below.

54 **D.1 Synthetic dataset I: NeSymReS**

55 We used the NeSymReS<sup>1</sup> dataset to test the performance of NIERT for mathematical function  
 56 interpolation. This dataset was constructed following Biggio et al. [2] with only slight modification  
 57 for the sake of numerical interpolation. For clarity, we put the details of construction procedure in the  
 58 next subsection D.2, and list the summarized characteristics of this dataset as follows.

59 *Instance construction:* We randomly sampled  $N$  points from  $X = [-1, 1]^{d_x}$  ( $d_x$  represents the point  
 60 dimensionality) and calculate the values for these points with a mathematical function  $f$ . From these  
 61 points, we randomly picked  $n$  points as observed points and used the left-over as target points. In  
 62 the study, we chose different  $d_x$  for constructing datasets, including 1D, 2D, 3D, and 4D. For 1D  
 63 NeSymReS dataset, we set the scattered points number  $N$  as 256. For 2D/3D/4D NeSymReS dataset,  
 64 we set  $N$  as 512. We control observed points number  $n$  within the range of [5, 50].

65 *Training set and test set:* Each instance in training or test set was built using a mathematical function  
 66  $f$ . These functions were generated using a function sampler as performed in Ref. [2] (see further  
 67 details in Supplementary text). During the training process, 1 million instances are dynamically  
 68 sampled at each epoch as training set. We used the  $L_2$ -form loss function for this dataset. We also  
 69 generated 12000 instances and used them as test set.

70 *Dimensionality of points:* We evaluated NEIRT using scatter data with various dimensionality,  
 71 including 1D, 2D, 3D, and 4D.

72 *Approaches for comparison:* We compared NIERT with five representative interpolation approaches,  
 73 including radial basis function (RBF)[3, 4], MIR [5], conditional neural process (CNP)[6], attentive  
 74 neural process (ANP)[7] and TFR-transformer [1]. Among these approaches, RBF and MIR are  
 75 classical approaches that use explicit basis functions, while CNP, ANP and TFR-transformer use  
 76 neural networks to learn how to interpolate.

77 **D.2 NeSymReS dataset construction details**

78 Following the study of Biggio et al. [2], firstly, we generate equation *skeletons* which is refer to  
 79 the symbolic equation where numerical constants are replaced by placeholders [2]. Each equation  
 80 skeleton has the configured number ( $d_x$ ) of independent variables symbols. For example,  $y =$   
 81  $\sin(C_1x_1) + C_2x_2^2$  is a possible generated equation skeleton which includes constants placeholders  
 82  $C_1$  and  $C_2$  and two variables  $x_1$  and  $x_2$ . Such equation skeletons are considered expression trees  
 83 during generation. Each randomly-generated expression tree has up-to 5 non-leaf nodes, i.e, function  
 84 operators. Unnormalized weighted distribution shown in Table 7 is used for sampling each non-leaf  
 85 node. Each leaf node has a probability of 0.8 of being an independent variable and 0.2 of being an  
 86 integer. Different from [2] using almost all elementary functions symbols including discontinuous  
 87 ones like  $\ln$ ,  $\arcsin$ ,  $\tan$  for symbolic regression tasks, we only use the operators listed in Table 7  
 88 which guarantee that the generated function is continuous in the whole domain  $X = [-1, 1]^{d_x}$ , to  
 89 make it more suitable for interpolation tasks.

| Operator                 | +  | ×  | - | . <sup>2</sup> | . <sup>3</sup> | exp | sin | cos |
|--------------------------|----|----|---|----------------|----------------|-----|-----|-----|
| Unnormalized probability | 10 | 10 | 5 | 4              | 2              | 4   | 4   | 4   |

Table 7: Operator and corresponding un-normalized probabilities during the generating process of mathematical functions in NeSymReS dataset

90 Secondly, constants values are independently sampled from a uniform distribution  $\mathcal{U}(1, 5)$  and we get  
 91 a set of completely-defined mathematical-expression functions. Then we normalize those functions  
 92 to make their values range in  $[0, 1]$  and multiply it with a random number range  $[0.9, 1]$  to produce  
 93 diversity.

94 After those completely-defined functions obtained, we sample interpolation task for each function  
 95 by randomly sampling a set of support points  $\{x_i\}_i$  in  $X$ , evaluating the function and get the  
 96 corresponding  $\{y_i\}_i$ , and then splitting those data points into a observed points set and a target points

<sup>1</sup>Built based on <https://github.com/SymposiumOrganization/NeuralSymbolicRegressionThatScales>.

97 set. 512 scatter points are sampled using each function, of which a random number (ranging in  
98 [5, 50]) of points are set up as the observed points and the rest are set up as the target points.

99 During the generation of interpolation tasks, results with invalid values (NaN or inf) are removed.  
100 For  $d_x$  in configurations {1, 2, 3, 4}, we generate datasets separately and use them for training and  
101 testing. In particular, when  $d_x$  is configured, we generate 150 equation skeletons set for testing and 1  
102 million skeletons set for training. Each skeleton in the training set existing in the test set has been  
103 removed. At training time, interpolation tasks are sampled using equation skeletons from the training  
104 set in real time. At testing time, we use an interpolation task set containing 10000 instances, which  
105 are generated by the testing skeletons set.

### 106 D.3 Synthetic dataset II: TFRD-ADlet

107 We use the TFRD-ADlet<sup>2</sup> dataset to test the performance of NIERT for 2D temperature field re-  
108 construction. This dataset simulates the temperature field of mechanical devices in a high-fidelity  
109 fashion[1]. The characteristics of this dataset are summarized as follows. *Instance construction:*  
110 Each instance has  $200 \times 200$  regular grid points that represent the temperature field in a  $0.1m \times 0.1m$   
111 square area. Among these grid points, 32 points have their temperate known and used as observed  
112 points. The other 3968 points are used as target points.

113 *Training set and test set:* We have a total of 10,000 training instances and 10,000 test instances. For  
114 the sake of fair comparison, we also use  $L_1$ -form loss function for this dataset as performed in Ref.  
115 [1].

116 *Dimensionality of points:* The grid points are in a 2D plane.

117 *Approaches for comparison:* For this dataset, we compared NIERT with three neural network-based  
118 interpolation approaches, including conditional neural process (CNP)[6], attentive neural process  
119 (ANP)[7] and TFR-transformer [1]. We also compared NIERT with its enhanced version that was  
120 pre-trained using the NeSymReS dataset.

### 121 D.4 Real-world dataset: PhysioNet

122 We use the PhysioNet<sup>3</sup> dataset, excerpted from the PhysioNet Challenge 2012 [8], to test the  
123 performance of NIERT for time-series data interpolation. This real-world dataset were collected from  
124 intensive care unit (ICU) records. It should be pointed out that this dataset is a representative of hard  
125 interpolation tasks due to the sparsity and irregularity of the records.

126 *Instance construction:* Each instance consists of multiple points, each of which represents a mea-  
127 surement of a patient at a specific time. Following the study in Ref. [9], we randomly divided the  
128 points into observed points and target points. We also set the ratio of observed points at five levels,  
129 i.e., 50%, 60%, 70%, 80%, and 90%, and evaluated NIERT using the thus-acquired datasets.

130 *Training set and test set:* We randomly divided the 8,000 instances acquired from the PhysioNet  
131 Challenge 2012 into training set and test set with a ratio of 4:1. For the sake of fair comparison, we  
132 use  $L_2$ -form loss function for this dataset as performed in Ref. [9].

133 *Dinsionality of points:* Each point in an instance represents a measurement at a specific time and each  
134 measurement contains up to 37 physiological indices; thus, the independent variable  $x$  is 1D while  
135 the dependent variable  $y$  has a dimensionality of 37.

136 *Approaches for comparison:* On this dataset, we compared NIERT with four representative approaches  
137 designed for time-series data interpolation, including RNN-VAE [10], L-ODE-RNN [11], L-ODE-  
138 ODE[12], and mTAND-Full[9]. The details of these approaches are provided in Supplementary  
139 text. We also compared NIERT with its enhanced version that was pre-trained using the NeSymReS  
140 dataset.

---

<sup>2</sup>TFRD-Alet is downloadable at <https://pan.baidu.com/s/14BipTerIfkilbRjrQNbKiQ>, password: 'tfrd'.

<sup>3</sup>PhysioNet is downloadable at <https://physionet.org/content/challenge-2012/1.0.0/>.

## 141 E Approaches for comparison

142 **Radial basis function (RBF)** RBF is one of the most commonly-used scattered data interpolation  
143 methods. It adopts a specific type of radial basis functions on observed points and uses their linear  
144 combination to represent the target function. We use the RBF interpolation implementation in SciPy  
145 [13] and multiquadric function as basis function type for the experiments.

146 **MIR** MIR<sup>4</sup> is another multivariate interpolation and regression method for scattered data sets  
147 proposed by [14]. MIR represents the approximation error with Taylor expansions and minimizes the  
148 approximation error to find the basis functions.

149 **Conditional neural process (CNP)** CNP proposed by [6] is a neural model able to learn to predict  
150 distributions of target points values given a series of observed points. In order to fully verify the  
151 accuracy of interpolation, we let CNP to predict the values of target only and the training criteria  
152 function is set to be the prediction error of values of target points in the experiments.

153 **Attentive neural process (ANP)** ANP [7] leverages attention mechanism in CNP and improves the  
154 prediction performance. In the experiments, the criteria function are fixed as same as CNP above.

155 **Bootstrapping attentive neural process (BANP)** BANP [15] employs bootstrap technique to  
156 further improve the performance of ANP. In the experiments, the criteria function are fixed as same  
157 as CNP and ANP above.

158 **TFR-Transformer** Transformer [7] is originally proposed to solve tasks in natural language  
159 processing. [1] adopts Transformer in 2-dimensional temperature field reconstruction using scattered  
160 observations. Compared with vanilla transformer, TFR-Transformer removes positional encoding,  
161 encodes the observations using encoder, using cross-attention mechanism between observations’  
162 encoding and target points to represents targets’ features at decoder, and using a MLP to map targets’  
163 features to values.

164 **RNN-VAE** RNN-VAE is a VAE-based model where the encoder and decoder are standard RNN  
165 models. Gated Recurrent Unit (GRU) [10] module is configured as the recurrent network.

166 **L-ODE-RNN** L-ODE-RNN refers to latent neural ODE model where the encoder is an RNN and  
167 decoder is a neural ODE proposed in [11].

168 **L-ODE-ODE** [12] proposes ODE-RNN model which generalize RNNs to have continuous-time  
169 hidden dynamics defined by ODEs. L-ODE-ODE refers to the model where the encoder is an  
170 ODE-RNN and decoder is a neural ODE.

171 **mTAND-Full** [9] proposes mTAND-Full for interpolation and classification of sparse, irregularly  
172 sampled, and multivariate time series data. mTAND-Full performs time attention mechanism to learn  
173 temporal similarity and Bidirectional RNNs to encode temporal features. Mask mechanism makes  
174 the representation of missing data and target points convenient and easy to parallel.

## 175 F Additional results

### 176 F.1 Experiments on high-dimensional synthetic data

In order to verify the scalability of NIERT on higher dimensional data, we specially constructed a  
synthetic 10D dataset to evaluate. In this dataset, each function is obtained by the summation of  $K$   
randomly sampled 10-dimensional Gaussian functions, which can be formalized as

$$f(x) = \sum_{k=1}^K A_k \exp\left(-\frac{1}{2} \frac{(x - c_k)^2}{\sigma_k^2}\right).$$

177 We fix  $K$  as 5. For each Gaussian function using in each function, we uniformity sampled the center  
178  $c_k$  from  $[-1, 1]^{10}$ , width  $\sigma_k$  from  $[1, 2]$  and weight  $A_k$  from  $[-1, 1]$ .

179 We created a training set containing 256K instances and test set containing 512 cases from this  
180 function distribution. Each instance includes 64 observed points and 192 target points, which are  
181 uniformly sampled from  $[-1, 1]^{10}$ . On the test set, we directly evaluated the classical methods,

---

<sup>4</sup>MIR’s implementation can be found at <http://web.mit.edu/qiqi/www/mir/>

182 and also evaluated the data-driven models after 100 epochs of training. We show the interpolation  
 183 accuracy of these methods in the Table 8.

| Approach | RBF     | MIR     | CNP    | ANP    | BANP   | TFR-transformer | NIERT        |
|----------|---------|---------|--------|--------|--------|-----------------|--------------|
| Accuracy | 181.744 | 161.474 | 35.623 | 12.578 | 12.077 | 7.465           | <b>5.496</b> |

Table 8: Interpolation accuracy ( $\text{MSE} \times 10^{-4}$ ) on 10D test set

184 These results show that NIERT still maintains the best accuracy on high-dimensional data, suggesting  
 185 its scalability. Noted that we only changed the input layer dimension of NIERT in order to deal with  
 186 this 10-dimensional data, so the calculation cost increases by a limited margin.

## 187 F.2 More Ablation studies

### 188 The effects of different model depths

189 We carried out experiments on 2D NeSymReS dataset using NIERT with hyper-parameter  $L$  varying  
 190 from 3 to 7. Then evaluate the models on the 2D NeSymReS test dataset. Accuracy are listed in  
 191 below Table 9. The results show that NIERT with 7 transformer layers has the best accuracy on the  
 192 test set, and NIERT with 6 transformer layers has reached a comparable level. Therefore, in the  
 193 experiments on NeSymReS data set, we use  $L = 6$  to balance efficiency and accuracy.

| Interpolation approach | Number of transformer layers $L$ |        |        |        |               |
|------------------------|----------------------------------|--------|--------|--------|---------------|
|                        | 3                                | 4      | 5      | 6      | 7             |
| NIERT                  | 66.812                           | 60.133 | 52.098 | 45.319 | <b>44.043</b> |

Table 9: Interpolation accuracy ( $\text{MSE} \times 10^{-5}$ ) varying number of transformer layers  $L$  in NIERT on 2D NeSymReS dataset

### 194 The effects of different hidden dimensions

195 We also carried out experiments on 2D NeSymReS dataset using NIERT with smaller hidden  
 196 dimensions  $d_{model}$ , say from 256, 128 and 64. Then evaluate the models on the 2D NeSymReS test  
 197 dataset. Accuracy are listed in below Table 10. The results show that when the hidden dimension is  
 198 within 512, NIERT’s interpolation accuracy is higher when the hidden dimension is larger.

199 In this experiment, we fix other super parameters, say model depth  $L$  as 6 and number of heads as 8.

| Interpolation approach | Different hidden dimensions $d_{model}$ |        |        |               |
|------------------------|-----------------------------------------|--------|--------|---------------|
|                        | 64                                      | 128    | 256    | 512           |
| NIERT                  | 106.193                                 | 72.107 | 51.153 | <b>45.319</b> |

Table 10: Interpolation accuracy ( $\text{MSE} \times 10^{-5}$ ) varying hidden dimension  $d_{model}$  in NIERT on 2D NeSymReS dataset

### 200 The effects of prediction error of observed points in loss function

201 To verify the contribution of re-predicting values of the observed points to the interpolation task,  
 202 we conducted an experiment that puts the prediction error of observed points in the loss function,  
 203 i.e. only minimizes the estimation error of target points. The results are shown in Table 11 which  
 204 demonstrates that only minimizing estimation error of target points make NIERT performing poorly.  
 205 This indicates that re-predicting the value of observed points helps NIERT to predict the value of  
 206 target points more accurately.

### 207 The effects of partial self-attention

| Loss contains prediction error of | Only target points | All points    |
|-----------------------------------|--------------------|---------------|
| MSE ( $\times 10^{-5}$ )          | 48.931             | <b>45.319</b> |

Table 11: Interpolation accuracy (MSE  $\times 10^{-5}$ ) of NIERT trained with loss only containing the prediction error of the target points

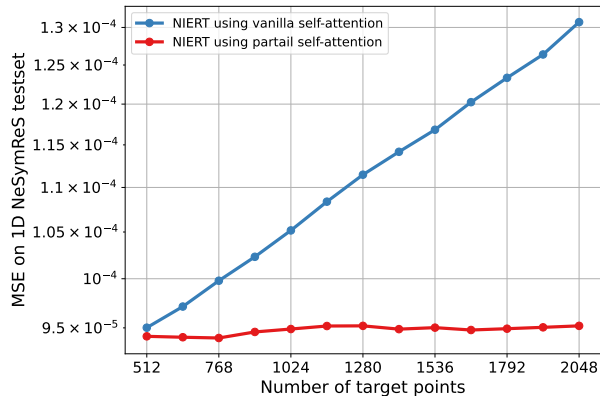

Figure 8: The robustness of NIERT to the number of target points. Here, two variants of NIERT are trained on 1D NeSymReS dataset

208 To verify the partial self-attention’s robustness to number of target points, Figure 7 has demonstrated  
 209 that when trained with instances whose number of target points varies within [206, 246], the variant  
 210 NIERT with vanilla self-attention shows poor performance for the tasks with few target points,  
 211 say less than 64 target points. However, NIERT with partial self-attention performs stably without  
 212 significant changes of accuracy.

213 As supplements to Figure 7, we examined the two variants of NIERT by evaluating them on instances  
 214 whose numbers of target points are much larger than them of training instances, say, varying in  
 215 [512, 2048]. As demonstrated in Figure 8, as the number of target points increases (from 512 to  
 216 2048), the interpolation error of NIERT with vanilla self-attention increases gradually. However, the  
 217 interpolation accuracy of NIERT with partial self-attention is almost unchanged, and maintains at a  
 218 better level.

### 219 F.3 Prediction accuracy gap between observed points and target points

| Prediction accuracy on | MSE ( $\times 10^{-5}$ ) on NeSymReS test sets |        |        |        |
|------------------------|------------------------------------------------|--------|--------|--------|
|                        | 1D                                             | 2D     | 3D     | 4D     |
| Observed points        | 1.301                                          | 4.862  | 3.775  | 2.662  |
| Target points          | 8.964                                          | 45.319 | 77.664 | 72.025 |

Table 12: Prediction accuracy gap between observed points and target points on NeSymReS test set

220 We carried out an extra experiment for prediction accuracy analysis on observed points and target  
 221 points. Figure 12 shows that on the observed points, the MSE of prediction is relatively smaller when  
 222 compared with it of target points as expected.

### 223 F.4 Visualization of the embedding layer of NIERT

#### 224 Embedding of observed points

225 Visualizing the embedding of observed points will help to understand the encoding learned by  
 226 NIERT. For the two examples shown in the text (Figure 3 4), we extracted the embedding of their

227 observed points from the NIERT embedding layer, obtained two principal components using PCA  
 228 dimensionality reduction, and visualized them in the Figure 9 and Figure 10.

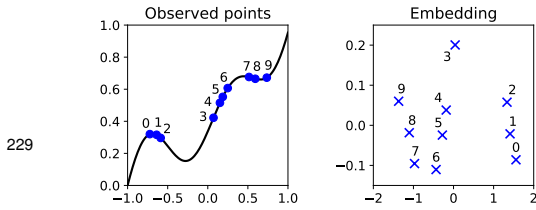

Figure 9: Visualization of scattered data embedding extracted from NIERT's embedding layer using a 1D interpolation case

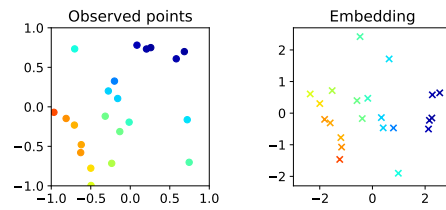

Figure 10: Visualization of scattered data embedding extracted from NIERT's embedding layer using a 2D interpolation case

230 From these two examples, we can see that scattered data embedding almost completely retains  
 231 the relative position information between scattered points. The 1D case also shows that the value  
 232 information is also embedded as expected (mainly on the second principal component).

233 **Learned parameters of embedding layer of NIERT**

234 In addition, we visualized the parameters learned by the niert embedding layer, as shown in the  
 235 Figure 11 and Figure 12, which correspond to the trained NIERT models on NeSymReS 1D and 2D  
 236 datasets respectively. These parameters, including weight  $w$  and bias  $b$  of  $\text{Linear}_x$  and  $\text{Linear}_y$ , and  
 237 the embedding of masked value  $\text{Mask}_y$ , indicate how the input scattered data is embedded into the  
 238 high-dimensional space.

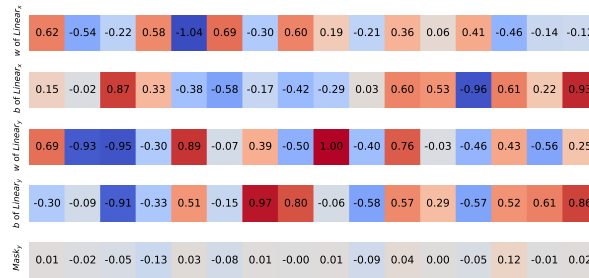

Figure 11: The learned parameters of embedding layer of NIERT for the NeSymReS 1D dataset

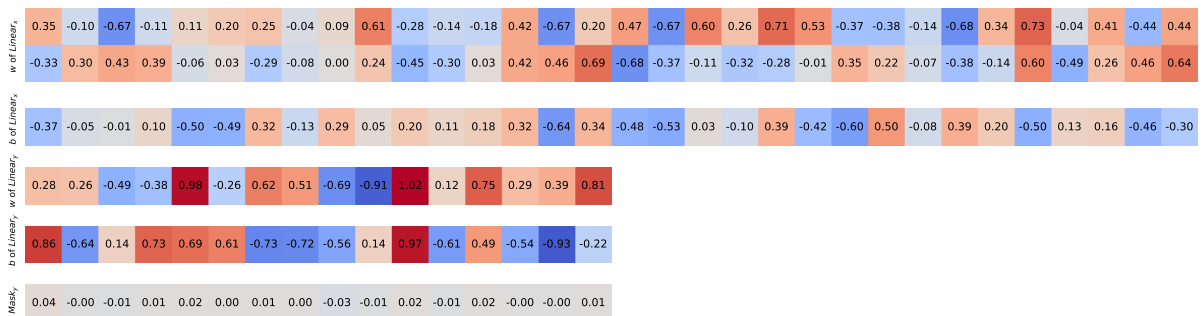

Figure 12: The learned parameters of embedding layer of NIERT for the NeSymReS 2D dataset



239 **F.5 More case studies**

240 **Cases from 1D & 2D NeSymReS test set**

241 In each example of 1D interpolation task extracted from NeSymReS test set, the blue curve represents  
 242 the ground-truth function while the red curves represent the interpolation functions reported by  
 243 NIERT and the existing approaches.

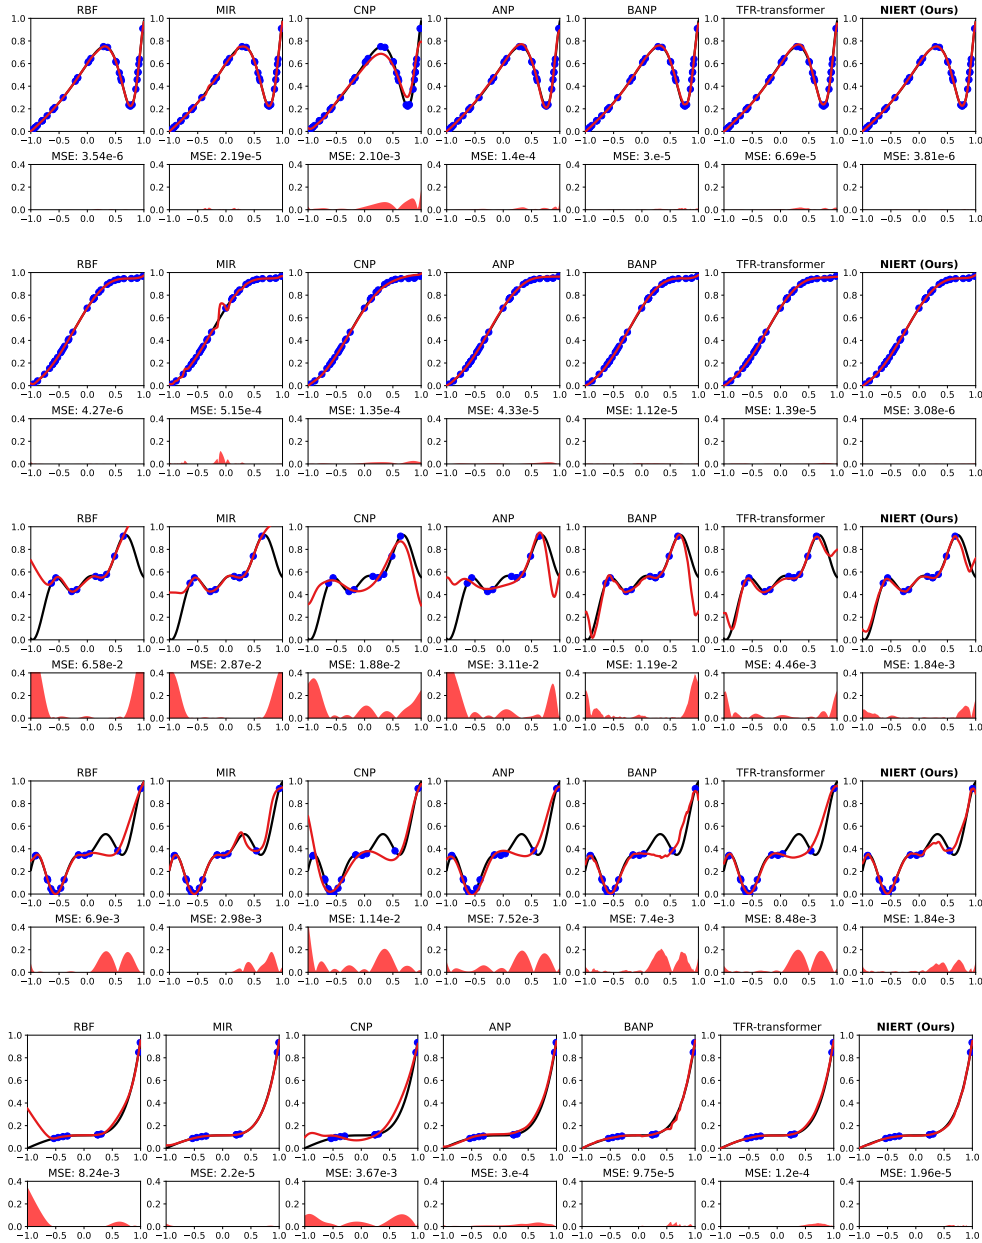

Figure 13: More cases from 1D NeSymReS test set

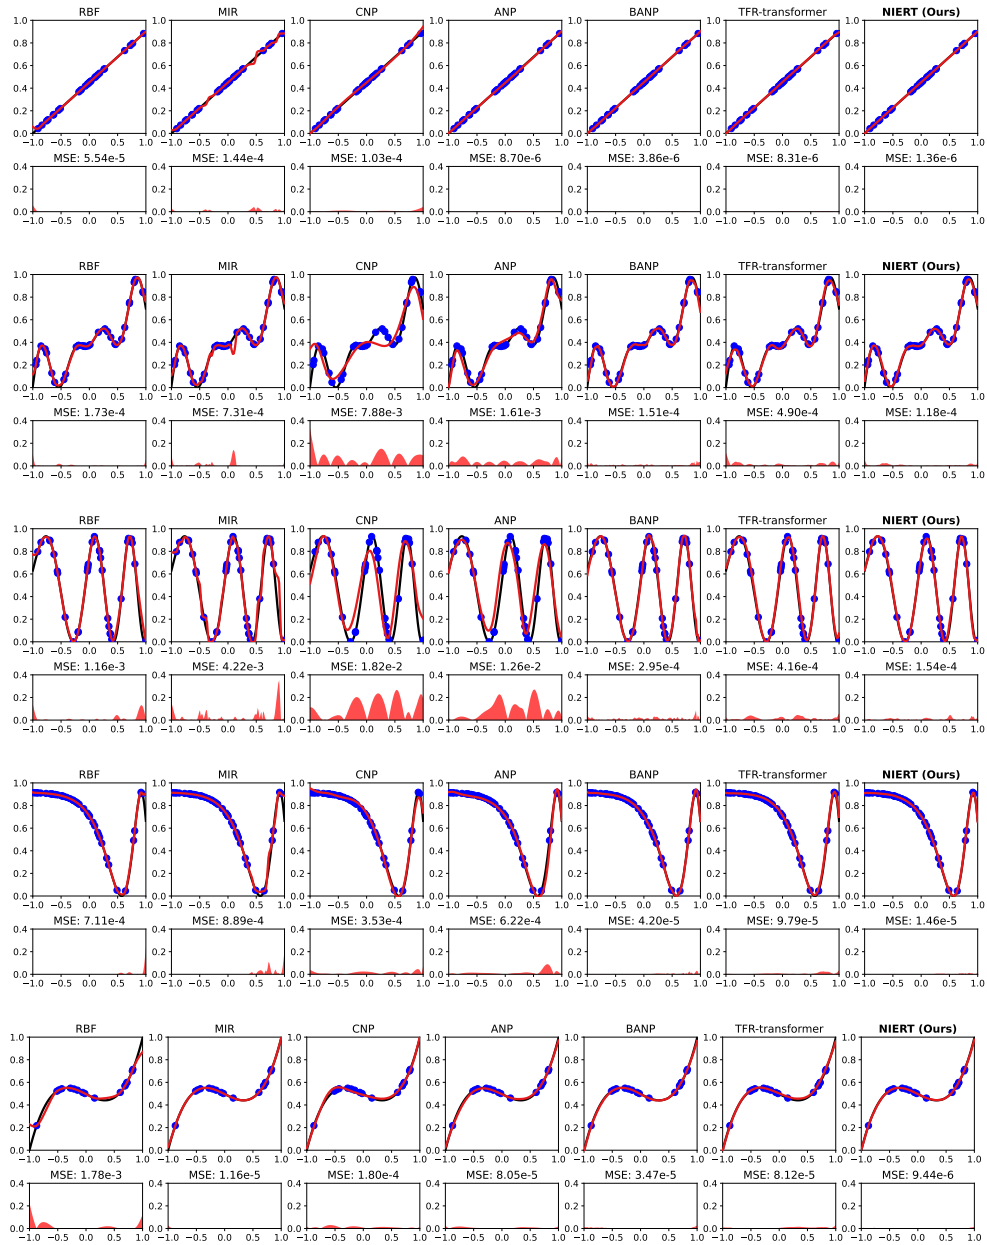

Figure 14: More cases from 1D NeSymReS test set

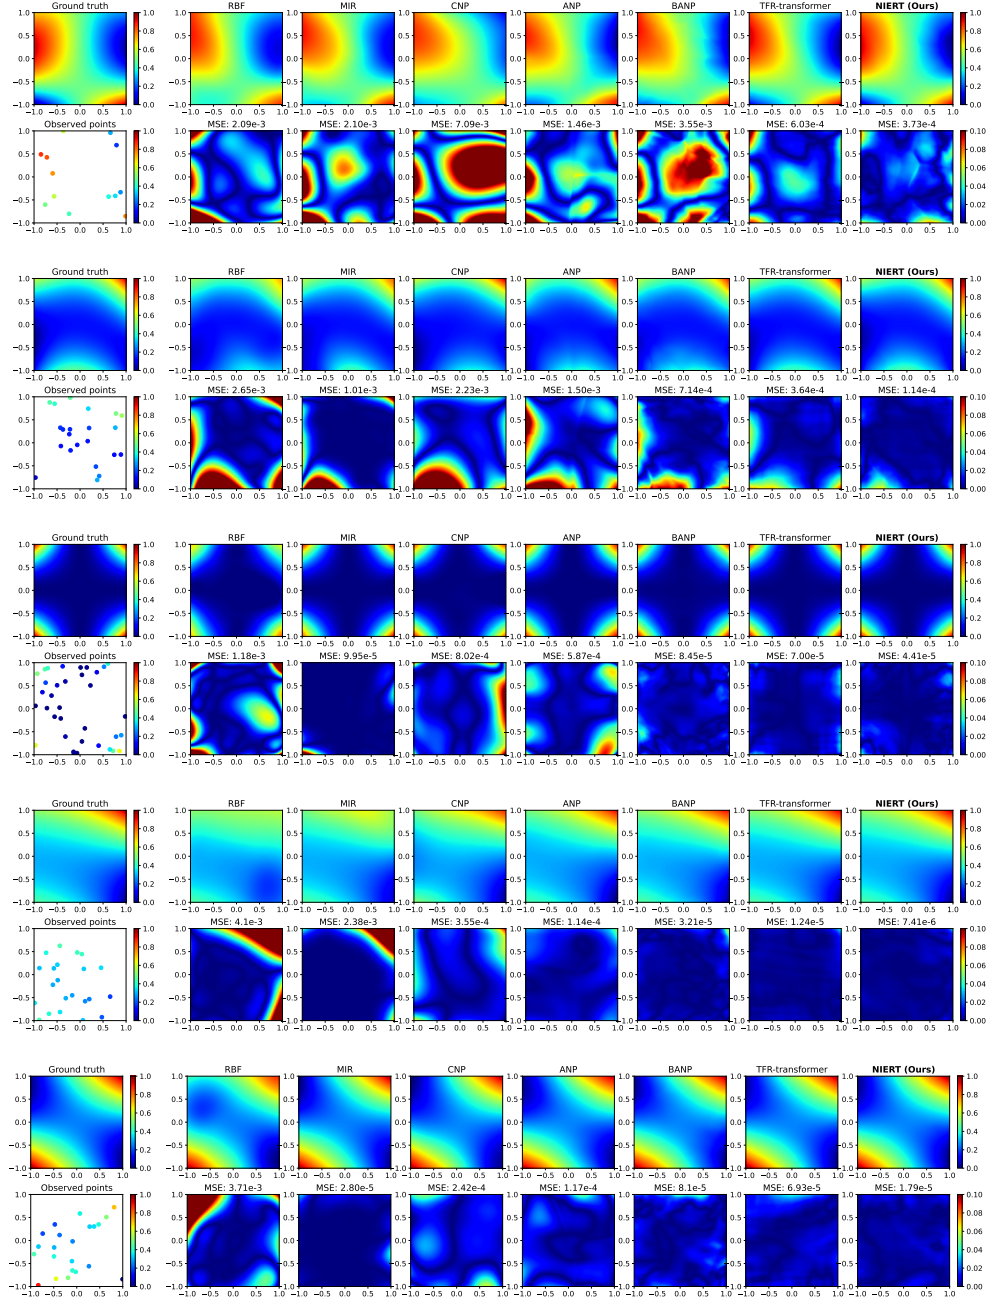

Figure 15: More cases from 2D NeSymReS test set

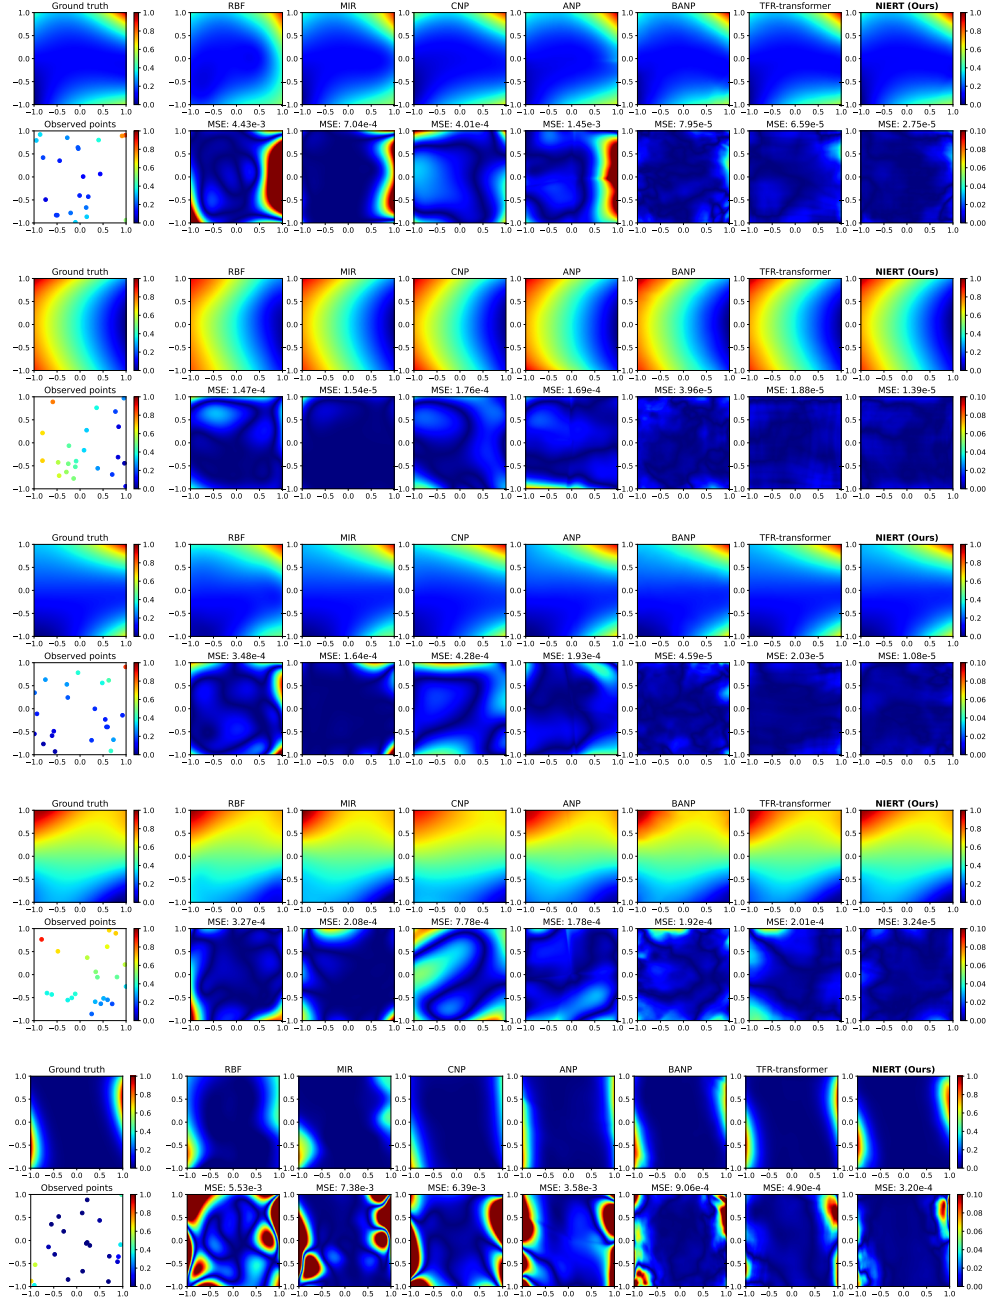

Figure 16: More cases from 2D NeSymReS test set

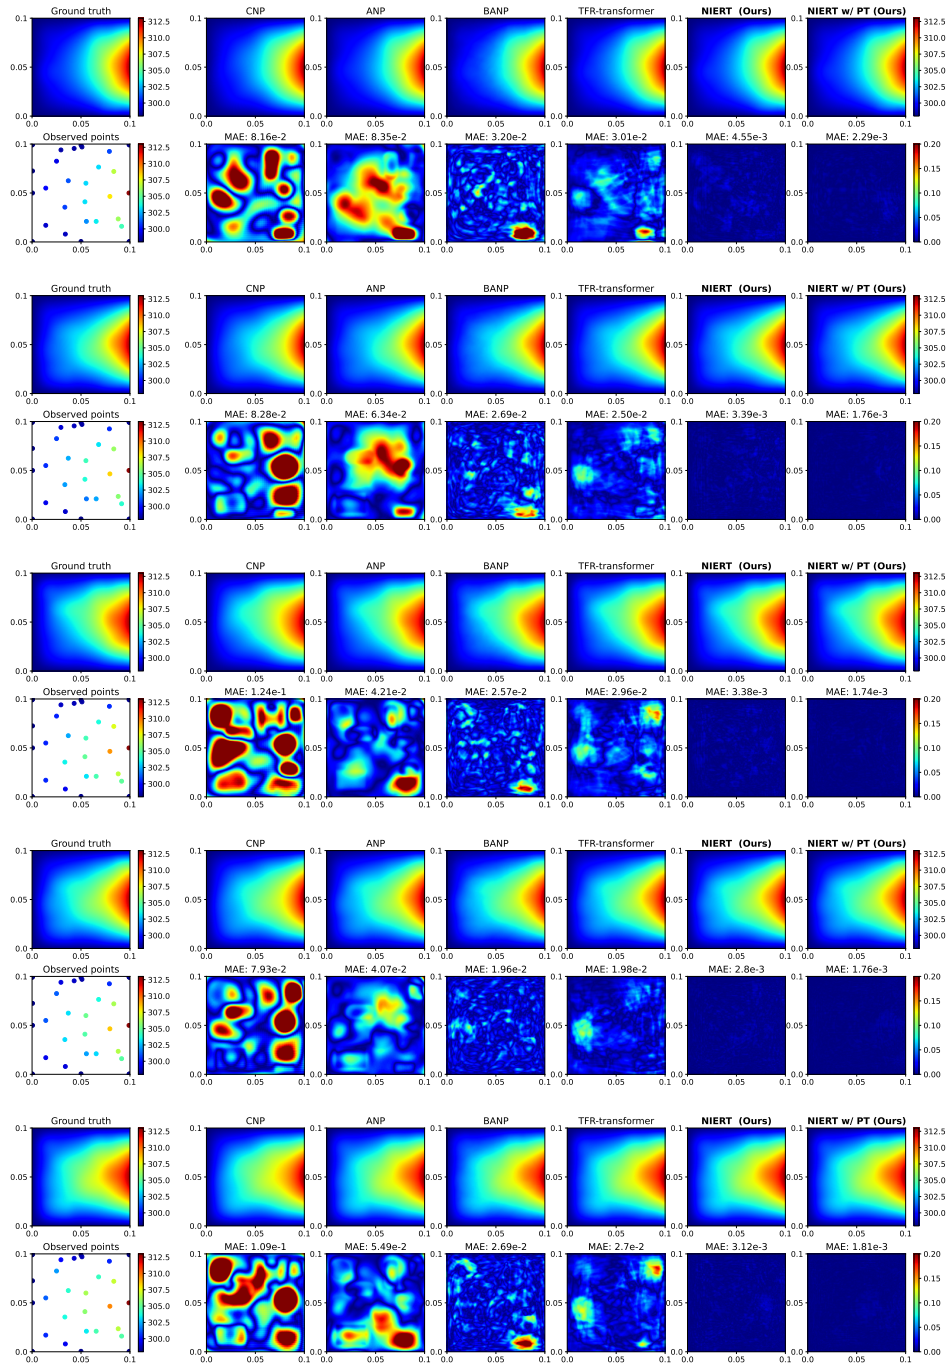

Figure 17: More cases from TFRD-ADlet test set

245 **E.6 Contribution analysis of observed points for interpolation**

246 As supplements to Figure 6, all observed points' attention weights extracted from the final attention  
247 layer of NIERT and TFR-transformer are visualized in Figure 18.

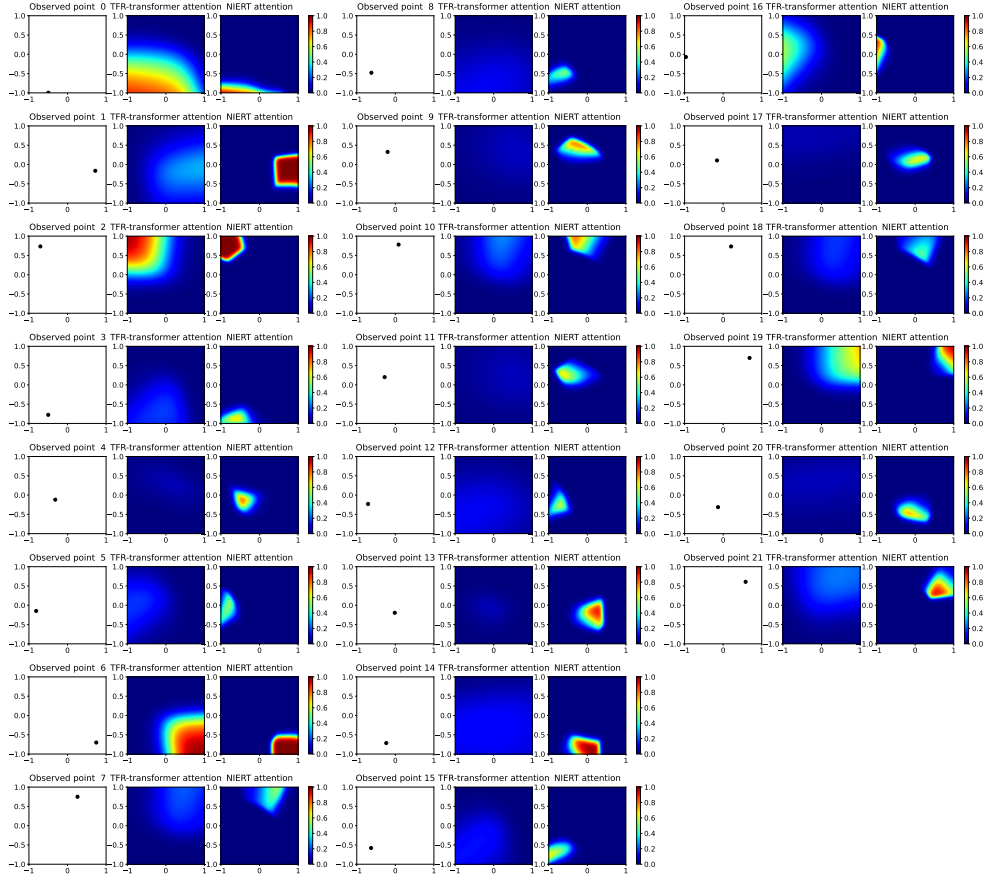

Figure 18: All observed points and the corresponding extracted attention response

248 The contributions by observed points are quit imbalanced using TFR-transformer. In contrast, when  
249 using NIERT, contributions by an observed point are much more local and thus targeted and all  
250 observed points have contributions to interpolation. This shows that NIERT can fully exploit the  
251 relationship between observed points and target points.

252 **References**

253 [1] Xiaoqian Chen, Zhiqiang Gong, Xiaoyu Zhao, Weien Zhou, and Wen Yao. A Machine Learning  
254 Modelling Benchmark for Temperature Field Reconstruction of Heat-Source Systems. *arXiv*  
255 *preprint arXiv:2108.08298*, 2021.

256 [2] Luca Biggio, Tommaso Bendinelli, Alexander Neitz, Aurelien Lucchi, and Giambattista Parascandolo. Neural Symbolic Regression that Scales. In *International Conference on Machine Learning*, pages 936–945. PMLR, 2021.

259 [3] Michael JD Powell. Radial basis functions for multivariable interpolation: a review. *Algorithms for approximation*, 1987.

261 [4] Bengt Fornberg and Julia Zuev. The Runge phenomenon and spatially variable shape parameters  
262 in RBF interpolation. *Computers & Mathematics with Applications*, 54(3):379–398, 2007.

263 [5] Hans Wackernagel. *Multivariate geostatistics: an introduction with applications*. Springer  
264 Science & Business Media, 2003.

- 265 [6] Marta Garnelo, Dan Rosenbaum, Christopher Maddison, Tiago Ramalho, David Saxton, Murray  
 266 Shanahan, Yee Whye Teh, Danilo Rezende, and S. M. Ali Eslami. Conditional Neural Processes.  
 267 In Jennifer Dy and Andreas Krause, editors, *Proceedings of the 35th International Conference on*  
 268 *Machine Learning*, volume 80 of *Proceedings of Machine Learning Research*, pages 1704–1713.  
 269 PMLR, 10–15 Jul 2018.
- 270 [7] Hyunjik Kim, Andriy Mnih, Jonathan Schwarz, Marta Garnelo, Ali Eslami, Dan Rosenbaum,  
 271 Oriol Vinyals, and Yee Whye Teh. Attentive Neural Processes. In *International Conference on*  
 272 *Learning Representations*, 2019.
- 273 [8] Ikaro Silva, George Moody, Daniel J Scott, Leo A Celi, and Roger G Mark. Predicting in-  
 274 hospital mortality of icu patients: The physionet/computing in cardiology challenge 2012. In  
 275 *2012 Computing in Cardiology*, pages 245–248. IEEE, 2012.
- 276 [9] Satya Narayan Shukla and Benjamin Marlin. Multi-Time Attention Networks for Irregularly  
 277 Sampled Time Series. In *International Conference on Learning Representations*, 2021.
- 278 [10] Junyoung Chung, Caglar Gulcehre, KyungHyun Cho, and Yoshua Bengio. Empirical evaluation  
 279 of gated recurrent neural networks on sequence modeling. *arXiv preprint arXiv:1412.3555*,  
 280 2014.
- 281 [11] Ricky T. Q. Chen, Yulia Rubanova, Jesse Bettencourt, and David Duvenaud. Neural Ordinary  
 282 Differential Equations. *Advances in Neural Information Processing Systems*, 2018.
- 283 [12] Yulia Rubanova, Ricky T. Q. Chen, and David K Duvenaud. Latent Ordinary Differential  
 284 Equations for Irregularly-Sampled Time Series. In H. Wallach, H. Larochelle, A. Beygelzimer,  
 285 F. d'Alché-Buc, E. Fox, and R. Garnett, editors, *Advances in Neural Information Processing*  
 286 *Systems*, volume 32. Curran Associates, Inc., 2019.
- 287 [13] Pauli Virtanen, Ralf Gommers, Travis E. Oliphant, Matt Haberland, Tyler Reddy, David  
 288 Cournapeau, Evgeni Burovski, Pearu Peterson, Warren Weckesser, Jonathan Bright, Stéfan J.  
 289 van der Walt, Matthew Brett, Joshua Wilson, K. Jarrod Millman, Nikolay Mayorov, Andrew  
 290 R. J. Nelson, Eric Jones, Robert Kern, Eric Larson, C J Carey, İlhan Polat, Yu Feng, Eric W.  
 291 Moore, Jake VanderPlas, Denis Laxalde, Josef Perktold, Robert Cimrman, Ian Henriksen, E. A.  
 292 Quintero, Charles R. Harris, Anne M. Archibald, Antônio H. Ribeiro, Fabian Pedregosa, Paul  
 293 van Mulbregt, and SciPy 1.0 Contributors. SciPy 1.0: Fundamental Algorithms for Scientific  
 294 Computing in Python. *Nature Methods*, 17:261–272, 2020. doi: 10.1038/s41592-019-0686-2.
- 295 [14] Qiqi Wang, Parviz Moin, and Gianluca Iaccarino. A high order multivariate approximation  
 296 scheme for scattered data sets. *Journal of Computational Physics*, 229(18):6343–6361, 2010.
- 297 [15] Juho Lee, Yoonho Lee, Jungtaek Kim, Eunho Yang, Sung Ju Hwang, and Yee Whye Teh.  
 298 Bootstrapping neural processes. In H. Larochelle, M. Ranzato, R. Hadsell, M.F. Balcan,  
 299 and H. Lin, editors, *Advances in Neural Information Processing Systems*, volume 33, pages  
 300 6606–6615. Curran Associates, Inc., 2020.
